# Supplementary material for: Highly flexible reduced graphene oxide@polypyrrole–polyethylene glycol foam for supercapacitors
Source: Royal Society of Chemistry journal article supplement (doi:10.1039/d0ra05199c), 2020-01-01
Supplement: d0ra05199c4.pdf [file d0ra05199c4.pdf]

## *Supporting Information*

### **Highly Flexible Reduced Graphene Oxide@Polypyrrole-Polyethylene**

#### **Glycol Foam for Supercapacitors**

Chaoyue Cai<sup>a,b</sup>, Jialong Fu<sup>a,b</sup>, Chengyan Zhang<sup>a,b</sup>, Cheng Wang<sup>b</sup>, Rui Sun<sup>b</sup>, Shufang Guo<sup>a,b</sup>, Fan Zhang<sup>a,b</sup>, Mingyan Wang<sup>a,b\*</sup>, Yuqing Liu<sup>c,d</sup>, Jun Chen<sup>d\*</sup>

<sup>a</sup> Department of Chemical Engineering, Jiangsu Ocean University, Lianyungang, 222005, China

<sup>b</sup> Jiangsu Key Laboratory of Marine Biotechnology /Jiangsu Key Laboratory of Marine Bioresources and environment /Co-Innovation Center of Jiangsu Marine Bio-industry Technology, Jiangsu ocean university, Lianyungang, 222005, China

<sup>c</sup> State Key Laboratory of Electronic Thin Film and Integrated Devices, University of Electronic Science and Technology of China, Chengdu, 610054, PR China.

<sup>d</sup> Intelligent Polymer Research Institute, ARC Centre of Excellence for Electromaterials Science, Australian Institute for Innovative Materials, Innovation Campus, University of Wollongong, Squires Way, North Wollongong, NSW2519, Australia

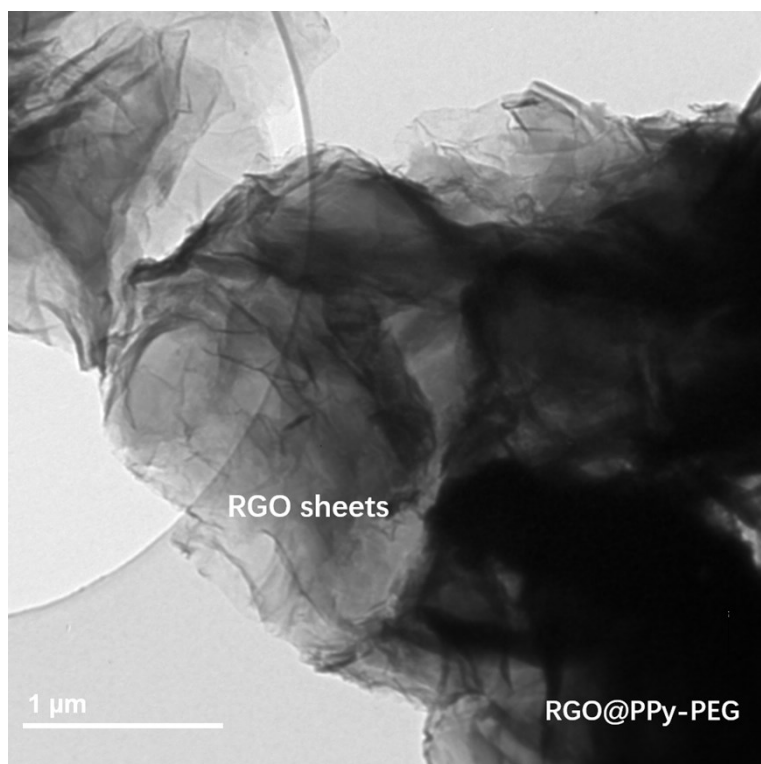

**Figure S1** TEM image of RGO@PPy-PEG sheet.

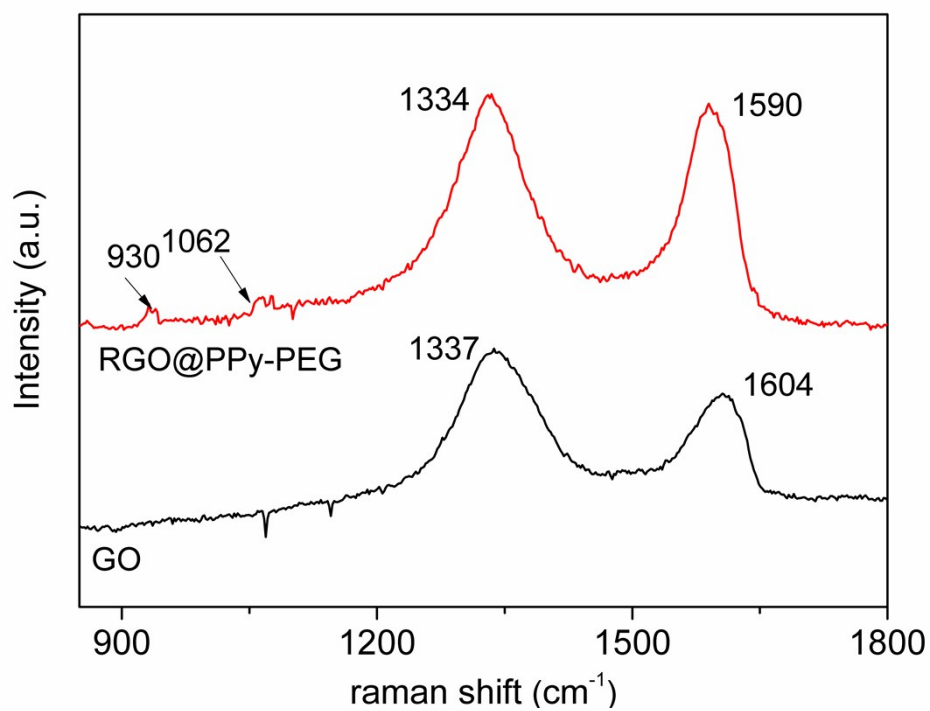

**Figure S2** Raman spectra of RGO@PPy-PEG and GO.

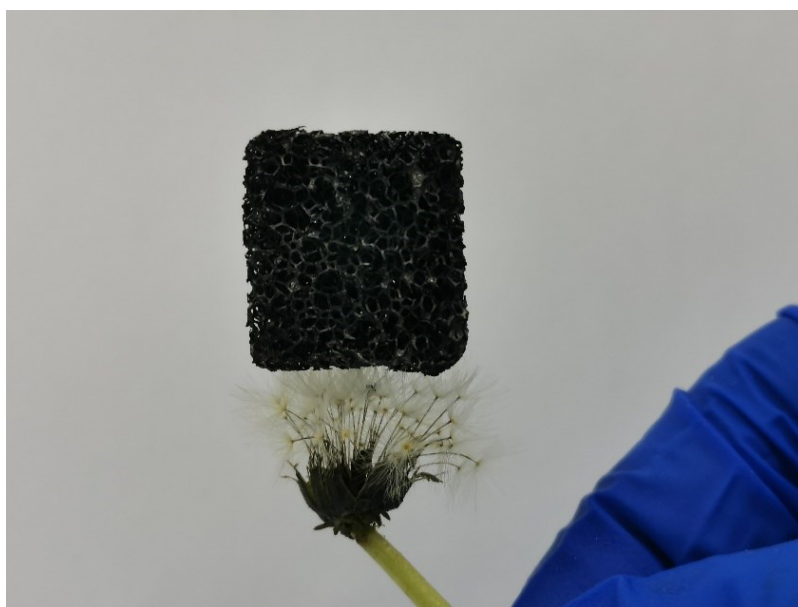

**Figure S3.** A Photograph of a RGO@PPy-PEG foam supported by the pappus of a dandelion flower

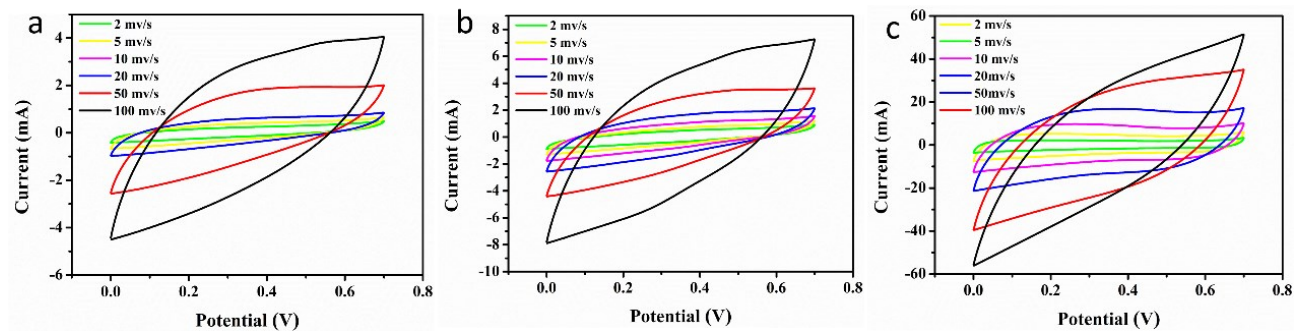

**Figure S4.** Electrochemical tests in a three-electrode system in 1 M  $\text{H}_2\text{SO}_4$ , CV curves (vs.SCE) of

(a) PPy-PEG (b) PPy, (c) RGO@PPy-PEG.

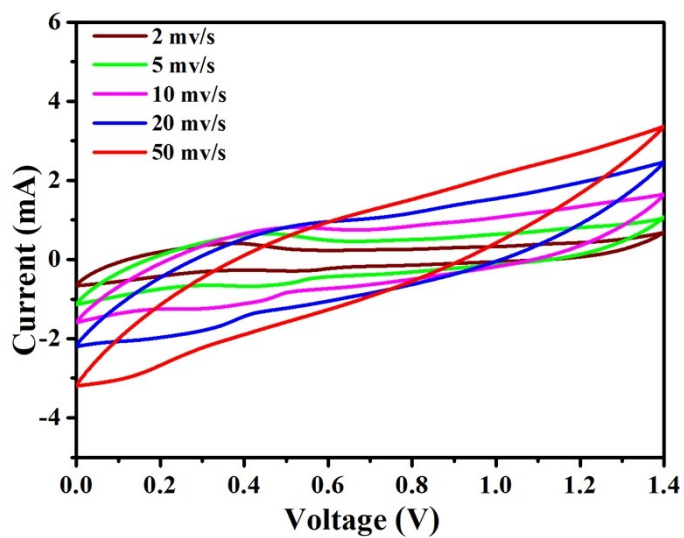

**Figure S5.** CV curves at different scan rates of the device.

**Table S1.** The specific capacitance for the hybrids at different current densities.

| GCD<br>$C_m$ (F/g) | 1 A/g | 2 A/g | 4 A/g | 10 A/g |
|--------------------|-------|-------|-------|--------|
| RGO@PPy-PEG        | 412   | 340   | 247   | 74     |
| PPy                | 153   | 78    | 51    | 25     |
| PPy-PEG            | 103   | 57    | 34    | 14     |
